# Supplementary material for: Glycaemic index (GI) suppression of bread using polyphenols enriched karonda powder: a strategy to reduce starch digestibility and increase polyphenols retention
Source: publisher site journal article supplement (doi:10.1515/ijfe-2024-0161), 2025-05-01
Supplement: Supplementary file 1 [file j_ijfe-2024-0161_suppl_001.doc]

**Supplementary Data**

**Identification and quantification of phenolics in *karonda* using HPLC**

Suppl. Fig 1. and Suppl. Table 1 provide information on various phenolic compounds analyzed using high-performance liquid chromatography (HPLC). The compounds include Gallic Acid + 4 Amino Benzoic Acid, (+) Catechin Hydrate, Caffeic Acid, Vanillic Acid, 3 Hydroxy Benzoic Acid, 2-3 Dihydroxybenzoic Acid, Syringic Acid, p-Coumeric Acid, Rutin, Trans Ferulic Acid, Chlorogenic Acid, Quercetin, Kaempferol, and Sinapic Acid. Retention times were determined, representing the time taken for each compound to travel through the chromatography column. Sinapic Acid exhibited the highest retention time (28.397), while Gallic Acid + 4 Amino Benzoic Acid had the lowest retention time (3.900).The study also calculated standard concentrations in parts per million (ppm) for each compound, indicating their concentration in the analyzed sample. The highest standard concentration was found for 3 Hydroxy Benzoic Acid (10040 ppm), while the lowest was for Kaempferol (100 ppm). These concentrations are crucial for quantification, assessing the relative abundance of different compounds in the sample.

**
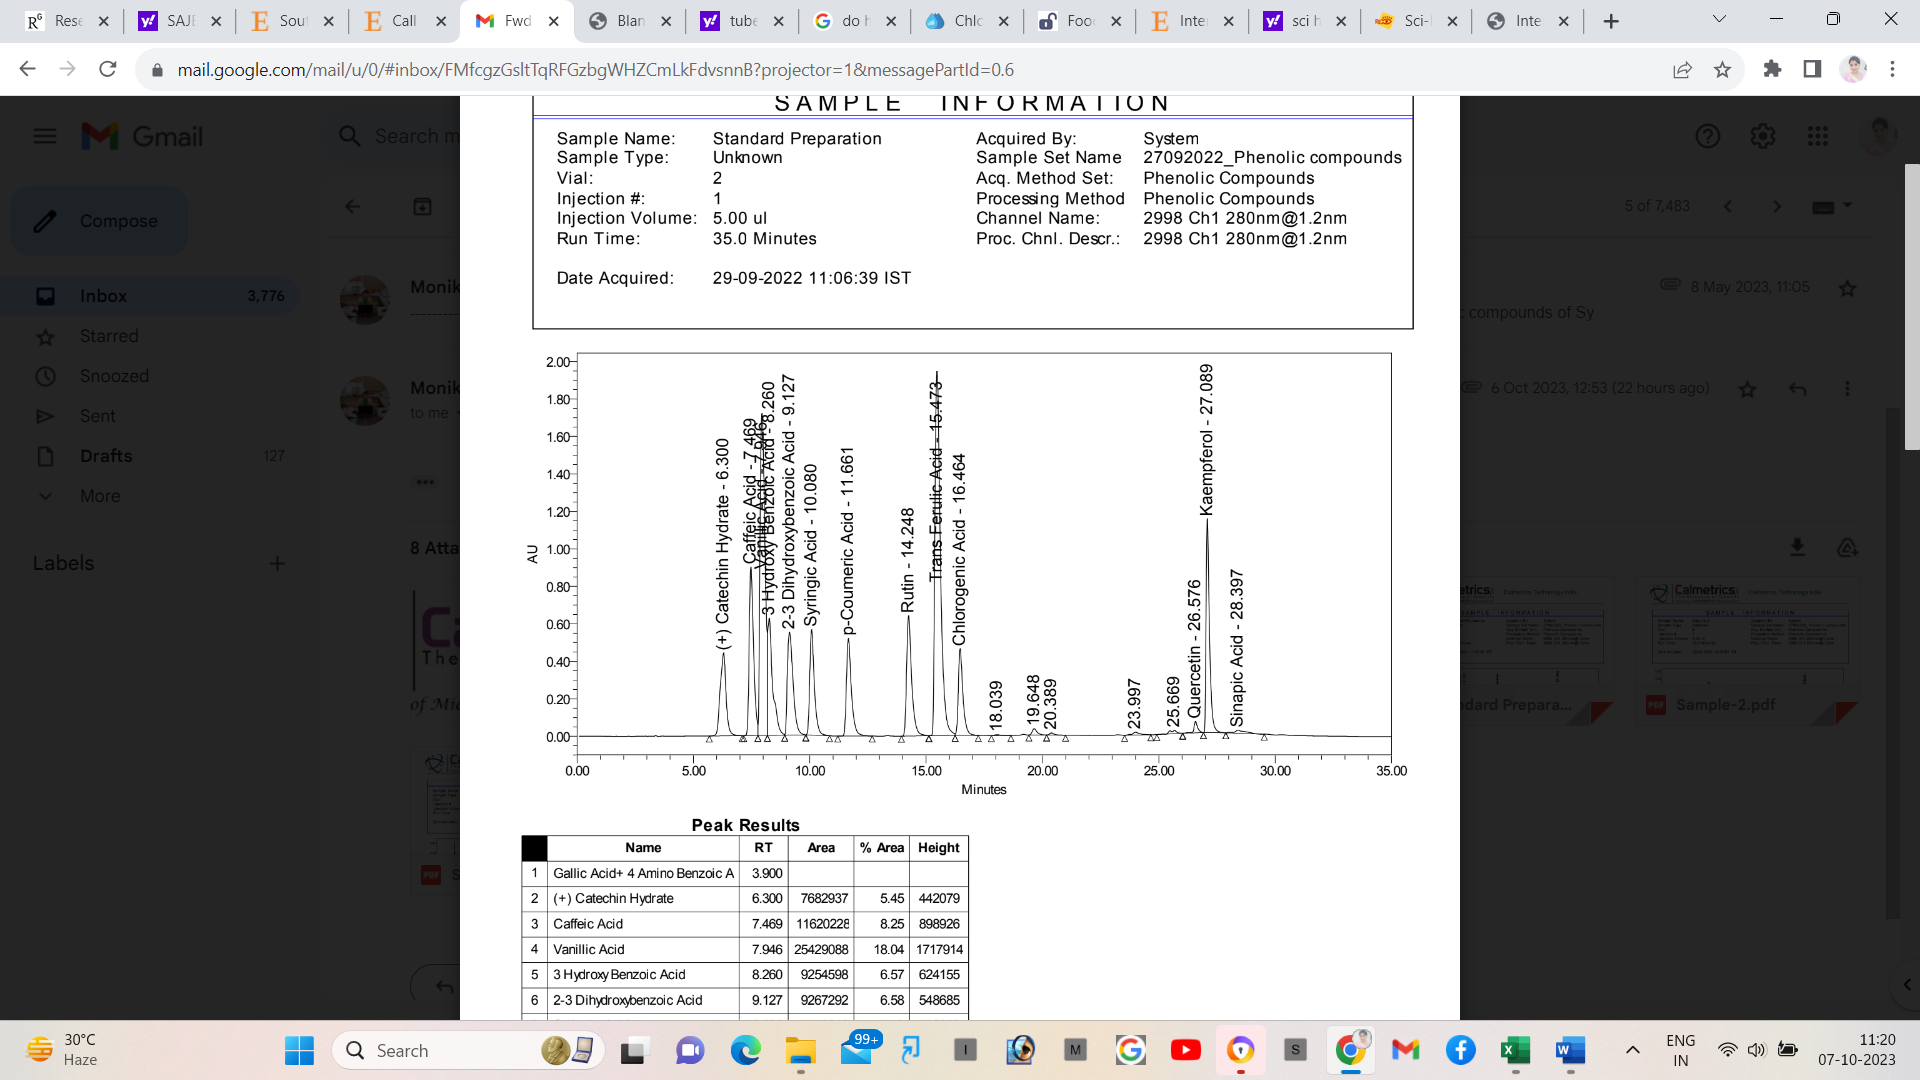
**

**Suppl. Fig 1. HPLC chromatogram of a mixture of polyphenolic standard compounds**

**Suppl. Table 1. Retention time and content of polyphenolic standards run on HPLC**

| **Phenolic compounds** | **Molecular weight (g/mol)** | **Retention Time (RT)** | **Std concentration (ppm)** |
| --- | --- | --- | --- |
| Gallic Acid+ 4 Amino Benzoic Acid | 170.12 137.138 g·mol−1 | 3.900 | 852.4 |
| (+) Catechin Hydrate | 308.28 | 6.300 | 2299 |
| Caffeic Acid | 180.16 | 7.469 | 401 |
| Vanillic Acid | 168.15 | 7.946 | 220 |
| 3 Hydroxy Benzoic Acid | 138.12 | 8.260 | 10040 |
| 2-3 Dihydroxybenzoic Acid | 154.12 | 9.127 | 10022 |
| Syringic Acid | 198.174 | 10.080 | 528 |
| p-Coumeric Acid | 164.16 | 11.661 | 350 |
| Rutin | 610.521 | 14.248 | 2125 |
| Trans Ferulic Acid | 194.18 | 15.473 | 700 |
| Chlorogenic Acid | 354.311 | 16.464 | 1500 |
| Quercetin | 302.236 | 26.576 | 105 |
| Kaempferol | 286.24 | 27.069 | 100 |
| Sinapic acid | 224.21 | 28.397 | 271 |

Suppl. Table 2 depicts the concentrations of each compound present in *karonda* powder in parts per million (ppm). The concentration of Gallic Acid+ 4 Amino Benzoic Acid, (+) Catechin Hydrate, Caffeic Acid, Vanillic Acid, 3 Hydroxy Benzoic Acid, 2-3 Dihydroxybenzoic Acid, Syringic Acid, p-Coumeric Acid, Rutin, Trans Ferulic Acid, Chlorogenic Acid, Quercetin, Kaempferol, Sinapic Acid found in *karonda* powder was 2.35, 2.44, 11.57, 19.95, 0.02, 9.13, 0.39, 0.57, 3.47, 0.27, 13.36, 0.00, 0.01, 23.74 ppm respectively. Thus, it was found that sinapicacid was found in highest concentration followed by vanillic caid, chlorogenic acid and caffeic acid. Quercetin was nondetectable in the sample. Azee*z et* al (2016) conducted a similar study in which they also found that Vanillic acid was present in the highest amount in *karonda* fruit.

**Suppl. Table 2. Identification and quantification of phenolic compounds in *karonda* using HPLC**

| **S. No.** | **Name** | **Molecular weight (g/mol)** | **Retention Time (RT)** | ***Karonda* powder concentration (ppm)** |
| --- | --- | --- | --- | --- |
| 1 | Gallic Acid+ 4 Amino Benzoic Acid | 170.12 137.138 g·mol−1 | 3.900 | 2.35 |
| 2 | (+) Catechin Hydrate | 308.28 | 6.300 | 2.44 |
| 3 | Caffeic Acid | 180.16 | 7.469 | 11.57 |
| 4 | Vanillic Acid | 168.15 | 7.946 | 19.95 |
| 5 | 3 Hydroxy Benzoic Acid | 138.12 | 8.260 | 0.02 |
| 6 | 2-3 Dihydroxybenzoic Acid | 154.12 | 9.127 | 9.13 |
| 7 | Syringic Acid | 198.174 | 10.080 | 0.39 |
| 8 | p-Coumeric Acid | 164.16 | 11.661 | 0.57 |
| 9 | Rutin | 610.521 | 14.248 | 3.47 |
| 10 | Trans Ferulic Acid | 194.18 | 15.473 | 0.27 |
| 11 | Chlorogenic Acid | 354.311 | 16.464 | 13.36 |
| 12 | Quercetin | 302.236 | 26.576 | 0.00 |
| 13 | Kaempferol | 286.24 | 27.069 | 0.01 |
| 14 | Sinapic acid | 224.21 | 28.397 | 23.74 |
|  | Total phenolic compounds in ppm | | | 87.27 |
